# Supplementary material for: Yolk–shell-structured MnO2microspheres with oxygen vacancies for high-performance supercapacitors
Source: Royal Society of Chemistry journal article supplement (doi:10.1039/c7ta10058b), 2017-12-19
Supplement: c7ta10058b1.pdf [file c7ta10058b1.pdf]

## Supporting information

### Yolk-shell structured $\text{MnO}_2$ microspheres with oxygen vacancies for high-performance supercapacitors

Yongsheng Fu<sup>a,†</sup>, Xiangyu Gao<sup>a,†</sup>, Daosong Zha<sup>a</sup>, Junwu Zhu<sup>a,\*</sup>, Xiaoping Ouyang<sup>b,\*</sup>,

Xin Wang<sup>a,\*</sup>

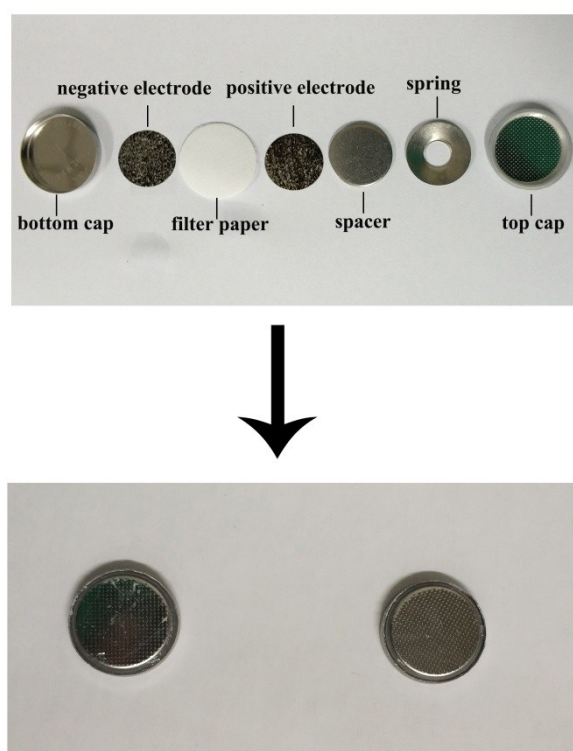

**Figure S1.** Schematic illustration of the fabrication process of  $ov\text{-MnO}_2@MnO_2//AC$  ASC device.

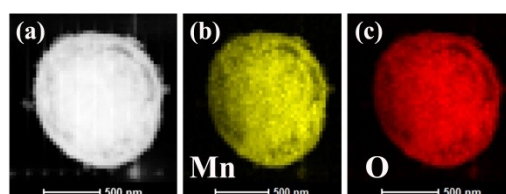

**Figure S2.** Elemental mapping images of Mn and O for  $ov\text{-MnO}_2@MnO_2$ .

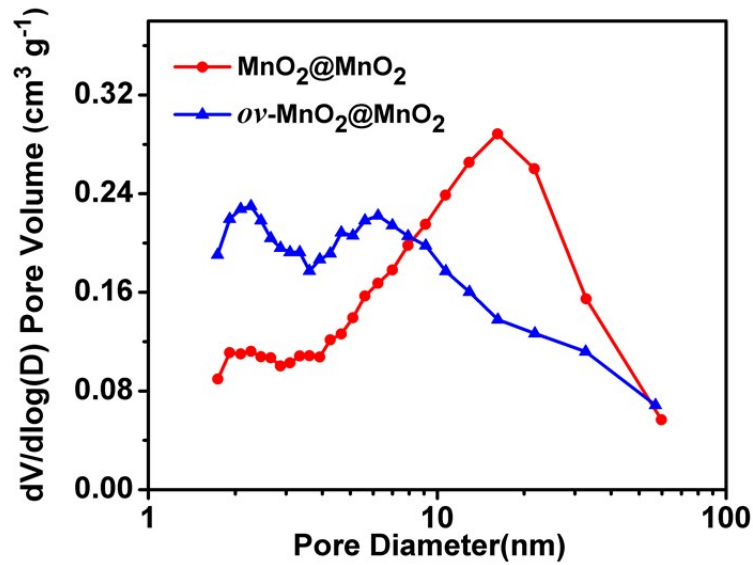

Figure S3. The pore size distribution of  $\text{MnO}_2@\text{MnO}_2$  and  $oV\text{-MnO}_2@\text{MnO}_2$ .

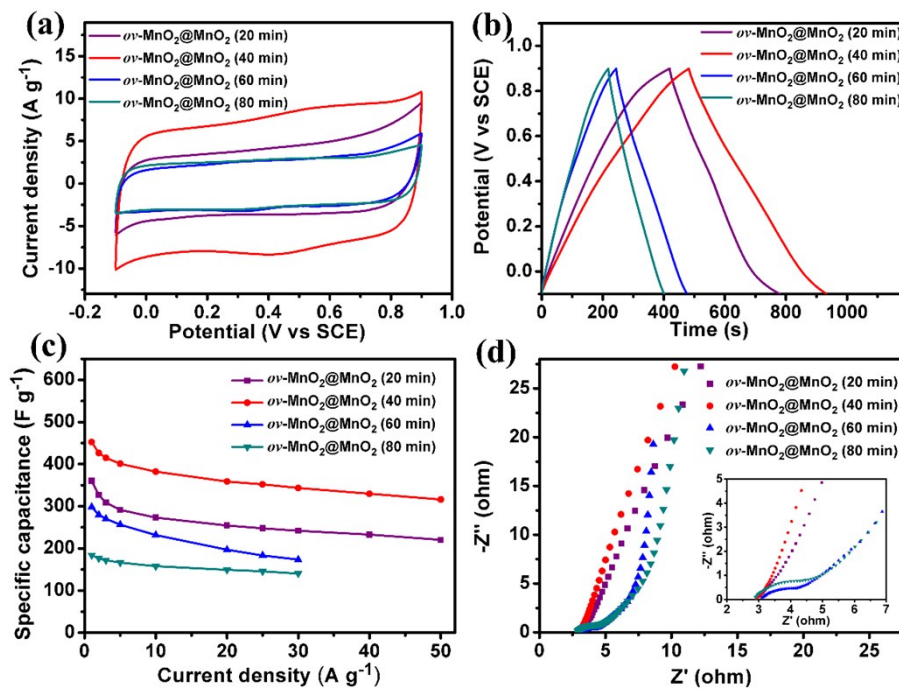

Figure S4. (a) Cyclic voltammetry recorded at a scan rate of  $20 \text{ mV s}^{-1}$ , (b) galvanostatic charge/discharge curves recorded at a current density of  $1 \text{ A g}^{-1}$ , (c) specific capacitance measured under different current densities and (d) EIS Nyquist plots at open circuit potential of as-prepared  $oV\text{-MnO}_2@\text{MnO}_2$  at different heat treatment time.

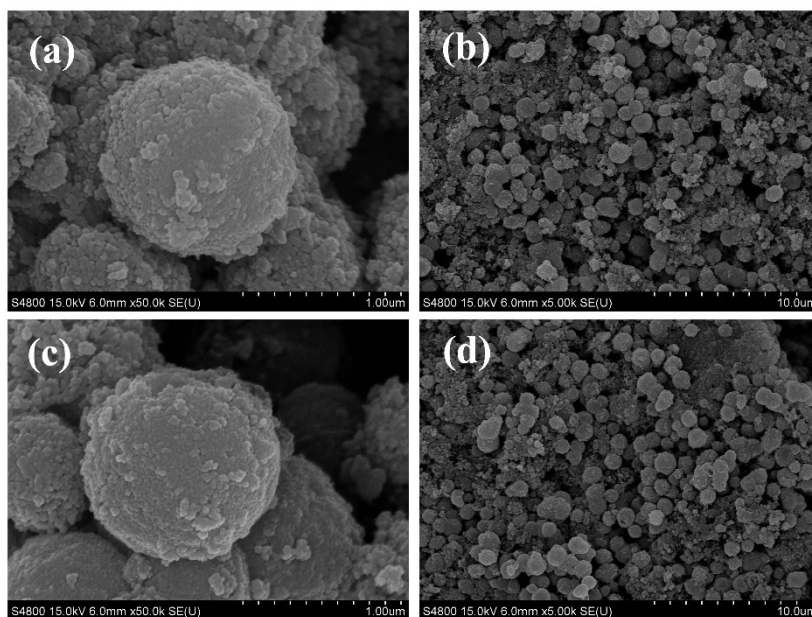

**Figure S5.** SEM images of the yolk-shell  $ov\text{-MnO}_2@MnO_2$  electrode before and after repeated galvanostatic charge/discharge cycles: (a) the yolk-shell  $ov\text{-MnO}_2@MnO_2$  electrode before charging-discharging; (b) the yolk-shell  $ov\text{-MnO}_2@MnO_2$  electrode after 10000 cycles.

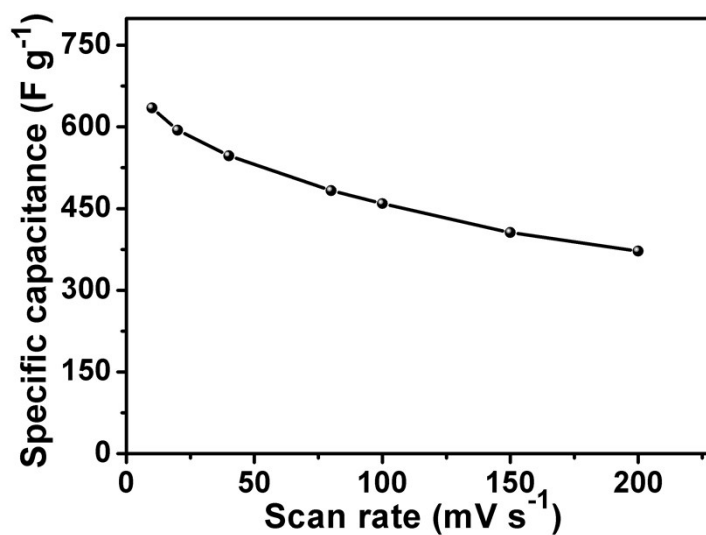

**Figure S6.** Calculated specific capacitances of the  $ov\text{-MnO}_2@MnO_2$  at different scan rates.

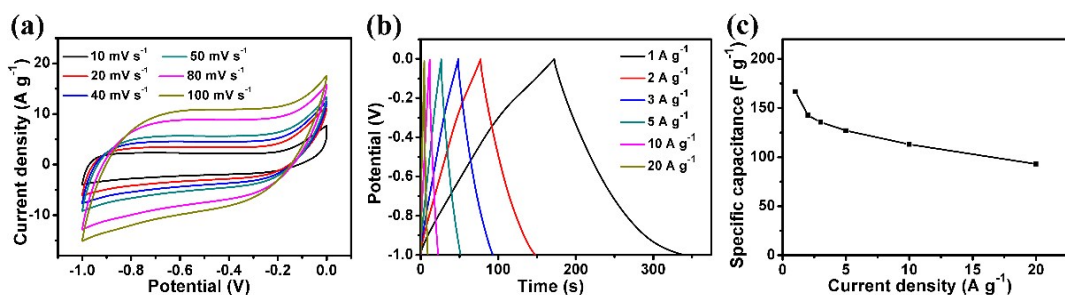

**Figure S7.** (a) CV curves at different scan rate, (b) GCD curves at different current densities and (c) Specific capacitance measured under different current densities of the AC electrode.

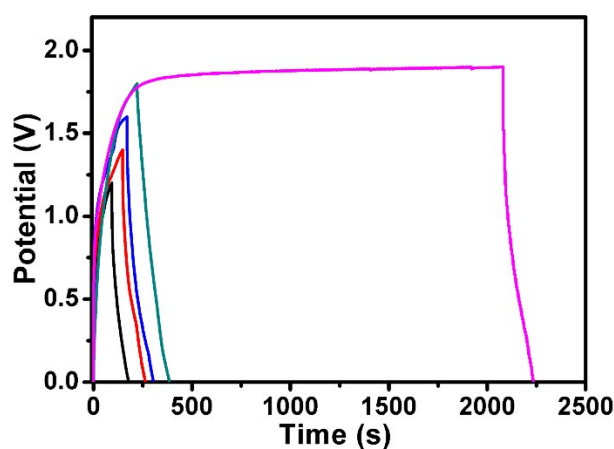

**Figure S8.** GCD curves at different potential windows of the *ov*-MnO<sub>2</sub>@MnO<sub>2</sub>//AC ASC.

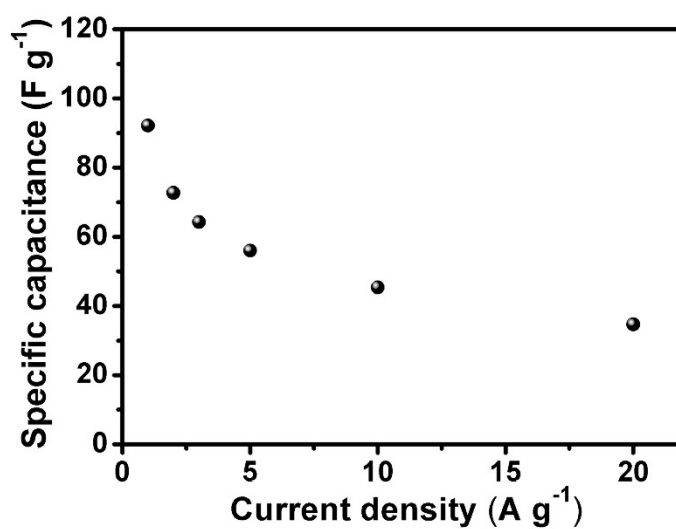

**Figure S9.** Specific capacitance measured under different current densities of the *ov*-MnO<sub>2</sub>@MnO<sub>2</sub> microspheres//AC ASC.

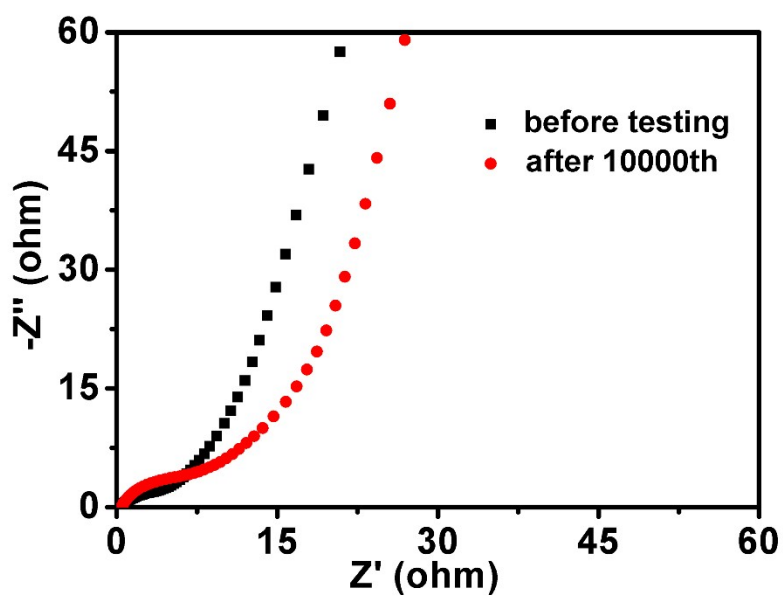

**Figure S10.** EIS Nyquist plots of the ASC device at open circuit potential before and after cycling test.

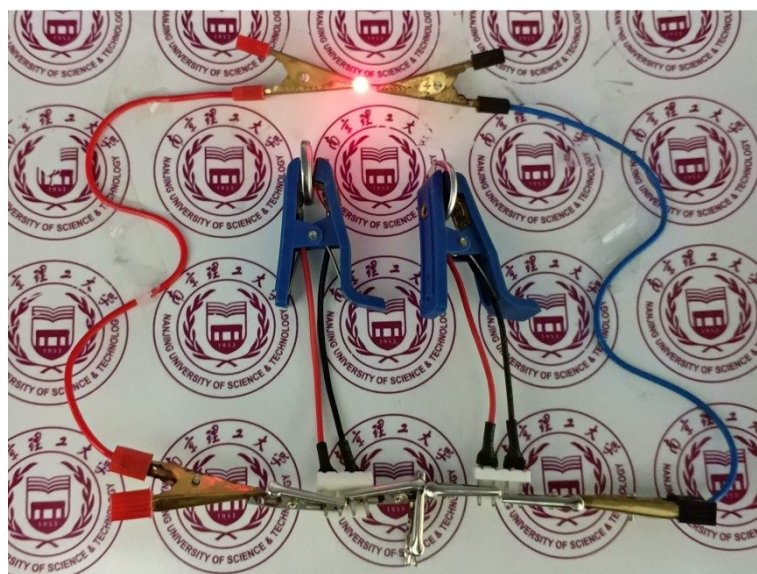

**Figure S11.** Optical image of the lightened LED lights.
